# Supplementary material for: The Frequency and Patterns of Post-COVID-19 Vaccination Syndrome Reveal Initially Mild and Potentially Immunocytopenic Signs in Primarily Young Saudi Women
Source: Preprints.org preprint supplement (doi:10.20944/preprints202206.0080.v1), 2022-06-06
Supplement: Supplementary file 1 [file supplementary]

## Sheet: Sheet1
Frequencies
Notes
Output Created		12-FEB-2022 08:38:20
Comments
Input	Data	C:\Users\Hafiz Bashir\Desktop\Kamal\HCQ - KSSH COVID-19 Research2.sav
	Active Dataset	DataSet1
	Filter	<none>
	Weight	<none>
	Split File	<none>
	N of Rows in Working Data File	998
Missing Value Handling	Definition of Missing	User-defined missing values are treated as missing.
	Cases Used	Statistics are based on all cases with valid data.
Syntax		FREQUENCIES VARIABLES=Sex Age Nationality Placeofresidence Educationallevel Whatkindofvaccineyoureceived IsthereanybruisesorbleedingITPsymptomsafteryoureceiveanydose IfBruisesorbleedingITPsymptomsappearafteranydayyoureceivethedose Afteranydoseappearedonyouthesesymptoms /ORDER=ANALYSIS.
Resources	Processor Time	00:00:00.03
	Elapsed Time	00:00:00.02
Statistics
		Sex	Age	Nationality	Place of residence	Educational level	What kind of vaccine you received?	Is there any bruises or bleeding ITP symptoms after you receive any dose?	If Bruises or bleeding ITP symptoms appear after any day you receive the dose?	After any dose appeared on you these symptoms?
N	Valid	998	998	998	998	998	998	998	998	998
	Missing	0	0	0	0	0	0	0	0	0
Frequency Table
Sex
		Frequency	Percent	Valid Percent	Cumulative Percent
Valid	female	785	78.6573	78.6573	78.6573
	Male	213	21.3427	21.3427	100
	Total	998	100	100
	Among the 998 participants, 785 (78.7%) are females.
Age
		Frequency	Percent	Valid Percent	Cumulative Percent
Valid	12-18	86	8.61723	8.61723	8.61723
	19-29	530	53.1062	53.1062	61.7234
	30-40	211	21.1423	21.1423	82.8657
	40-60	147	14.7295	14.7295	97.5952
	More than 60	24	2.40481	2.40481	100
	Total	998	100	100
Nationality
		Frequency	Percent	Valid Percent	Cumulative Percent
Valid	Non-Saudi	45	4.50902	4.50902	4.50902
	Saudi	953	95.491	95.491	100
	Total	998	100	100
Place of residence
		Frequency	Percent	Valid Percent	Cumulative Percent
Valid	Central Region	302	30.2605	30.2605	30.2605
	Eastern Region	155	15.5311	15.5311	45.7916
	Southern area	44	4.40882	4.40882	50.2004
	The northern area	343	34.3687	34.3687	84.5691
	Western Region	154	15.4309	15.4309	100
	Total	998	100	100
Educational level
		Frequency	Percent	Valid Percent	Cumulative Percent
Valid	Without formal education	8	0.801603	0.801603	0.801603
	Primary or Intermediate School	28	2.80561	2.80561	3.60721
	Secondary School	191	19.1383	19.1383	22.7455
	University	711	71.2425	71.2425	93.988
	Postgraduate	60	6.01202	6.01202	100
	Total	998	100	100
What kind of vaccine you received?
		Frequency	Percent	Valid Percent	Cumulative Percent
Valid	AstraZeneca	155	15.5311	15.5311	15.5311
	Moderna	34	3.40681	3.40681	18.9379
	Pfizer	809	81.0621	81.0621	100
	Total	998	100	100
	Among the 998 participants, 155 (15.5%) received astrazeneca, 34 (3.4%) received moderna, and 809 (81.1%) received pfizer, .
Is there any bruises or bleeding ITP symptoms after you receive any dose?
		Frequency	Percent	Valid Percent	Cumulative Percent
Valid	No	737	73.8477	73.8477	73.8477
	Yes	261	26.1523	26.1523	100
	Total	998	100	100
	In 737 (73.8%) participants there were no bruises or bleeding ITP symptoms. Bruises or bleeding ITP symptoms appeared in 261 (26.2) of the participants.
If Bruises or bleeding ITP symptoms appear after any day you receive the dose?
		Frequency	Percent	Valid Percent	Cumulative Percent
Valid	After 1-3 days	128	12.8257	12.8257	12.8257		After 1-3 days	128	49.0421
	After 4-7 days	57	5.71142	5.71142	18.5371		After 4-7 days	57	21.8391
	After 8-14 days	43	4.30862	4.30862	22.8457		After 8-14 days	43	16.4751
	After more than a month	33	3.30661	3.30661	26.1523		After more than a month	33	12.6437
	it did not appear	737	73.8477	73.8477	100			261
	Total	998	100	100
	Among the 261 participants in whome bruises or bleeding ITP symptoms appeared, the symptoms apeared within 1-3 days in 128 (49%), within 4-7 days in 57 (21.8%), within 8-14 days in 43 (16.5%), and within more than a month in 33 (12.6%).
After any dose appeared on you these symptoms?
		Frequency	Percent	Valid Percent	Cumulative Percent
Valid	After the first dose	87	8.71743	8.71743	8.71743
	After the second dose	97	9.71944	9.71944	18.4369		After the first dose	87	33.3333
	In both doses	77	7.71543	7.71543	26.1523		After the second dose	97	37.1648
	it did not appear	737	73.8477	73.8477	100		In both doses	77	29.5019
	Total	998	100	100				261
	Among the 261 participants in whome bruises or bleeding ITP symptoms appeared, the symptoms apeared in 87 (33.3%) after the first dose, in 77 (29.5%) after both the forst and the second dose..
CROSSTABS
/TABLES=Whatkindofvaccineyoureceived BY
IsthereanybruisesorbleedingITPsymptomsafteryoureceiveanydose
/FORMAT=AVALUE TABLES
/STATISTICS=CHISQ
/CELLS=COUNT ROW ASRESID
/COUNT ROUND CELL.
Crosstabs
Notes
Output Created		12-FEB-2022 08:40:39
Comments
Input	Data	C:\Users\Hafiz Bashir\Desktop\Kamal\HCQ - KSSH COVID-19 Research2.sav
	Active Dataset	DataSet1
	Filter	<none>
	Weight	<none>
	Split File	<none>
	N of Rows in Working Data File	998
Missing Value Handling	Definition of Missing	User-defined missing values are treated as missing.
	Cases Used	Statistics for each table are based on all the cases with valid data in the specified range(s) for all variables in each table.
Syntax		CROSSTABS /TABLES=Whatkindofvaccineyoureceived BY IsthereanybruisesorbleedingITPsymptomsafteryoureceiveanydose /FORMAT=AVALUE TABLES /STATISTICS=CHISQ /CELLS=COUNT ROW ASRESID /COUNT ROUND CELL.
Resources	Processor Time	00:00:00.00
	Elapsed Time	00:00:00.02
	Dimensions Requested	2
	Cells Available	349496
Case Processing Summary
	Cases
	Valid		Missing		Total
	N	Percent	N	Percent	N	Percent
What kind of vaccine you received? * Is there any bruises or bleeding ITP symptoms after you receive any dose?	998	1	0	0	998	1
What kind of vaccine you received? * Is there any bruises or bleeding ITP symptoms after you receive any dose? Crosstabulation
			Is there any bruises or bleeding ITP symptoms after you receive any dose?		Total
			No	Yes				Is there any bruises or bleeding ITP symptoms after you receive any dose?
What kind of vaccine you received?	AstraZeneca	Count	108	47	155			No	Yes
		% within What kind of vaccine you received?	0.696774	0.303226	1		AstraZeneca	0.696774	0.303226
		Adjusted Residual	-1.28546	1.28546			Moderna	0.441176	0.558824
		p value	0.198631	0.198631
	Moderna	Count	15	19	34		Pfizer	0.758962	0.241038
		% within What kind of vaccine you received?	0.441176	0.558824	1
		Adjusted Residual	-4.01364	4.01364
		p value	5.97896e-05	5.97896e-05
	Pfizer	Count	614	195	809
		% within What kind of vaccine you received?	0.758962	0.241038	1		Bonferroni corrected level of significance = 0.008333
		Adjusted Residual	3.0466	-3.0466
		p value	0.00231446	0.00231446
Total		Count	737	261	998
		% within What kind of vaccine you received?	0.738477	0.261523	1
	The frequency of bruises and ITP symptoms is significantly higher among participants who received moderna (p value = 0.00006) and it is significantly lower in participants who received pfizer (p value 0.00231)
Chi-Square Tests
	Value	df	Asymptotic Significance (2-sided)
Pearson Chi-Square	18.714a	2	8.63575e-05
Likelihood Ratio	16.5404	2	0.000256035
N of Valid Cases	998
a. 0 cells (0.0%) have expected count less than 5. The minimum expected count is 8.89.
CROSSTABS
/TABLES=Sex BY IsthereanybruisesorbleedingITPsymptomsafteryoureceiveanydose
/FORMAT=AVALUE TABLES
/STATISTICS=CHISQ
/CELLS=COUNT ROW ASRESID
/COUNT ROUND CELL.
Crosstabs
Notes
Output Created		12-FEB-2022 08:42:30
Comments
Input	Data	C:\Users\Hafiz Bashir\Desktop\Kamal\HCQ - KSSH COVID-19 Research2.sav
	Active Dataset	DataSet1
	Filter	<none>
	Weight	<none>
	Split File	<none>
	N of Rows in Working Data File	998
Missing Value Handling	Definition of Missing	User-defined missing values are treated as missing.
	Cases Used	Statistics for each table are based on all the cases with valid data in the specified range(s) for all variables in each table.
Syntax		CROSSTABS /TABLES=Sex BY IsthereanybruisesorbleedingITPsymptomsafteryoureceiveanydose /FORMAT=AVALUE TABLES /STATISTICS=CHISQ /CELLS=COUNT ROW ASRESID /COUNT ROUND CELL.
Resources	Processor Time	00:00:00.02
	Elapsed Time	00:00:00.03
	Dimensions Requested	2
	Cells Available	349496
Case Processing Summary
	Cases
	Valid		Missing		Total
	N	Percent	N	Percent	N	Percent
Sex * Is there any bruises or bleeding ITP symptoms after you receive any dose?	998	1	0	0	998	1
Sex * Is there any bruises or bleeding ITP symptoms after you receive any dose? Crosstabulation
			Is there any bruises or bleeding ITP symptoms after you receive any dose?		Total
			No	Yes
Sex	female	Count	573	212	785
		% within Sex	0.729936	0.270064	1
		Adjusted Residual	-1.17863	1.17863
	Male	Count	164	49	213
		% within Sex	0.769953	0.230047	1
		Adjusted Residual	1.17863	-1.17863
Total		Count	737	261	998
		% within Sex	0.738477	0.261523	1
Chi-Square Tests
	Value	df	Asymptotic Significance (2-sided)	Exact Sig. (2-sided)	Exact Sig. (1-sided)
Pearson Chi-Square	1.389a	1	0.238545
Continuity Correctionb	1.18969	1	0.275391
Likelihood Ratio	1.41762	1	0.233795
Fisher's Exact Test				0.254027	0.137318
N of Valid Cases	998
a. 0 cells (0.0%) have expected count less than 5. The minimum expected count is 55.70.
b. Computed only for a 2x2 table
	There is no significant difference in the frequency of bruises and bleeding ITP symptoms in males and females after receiving the vaccine.
CROSSTABS
/TABLES=Age BY IsthereanybruisesorbleedingITPsymptomsafteryoureceiveanydose
/FORMAT=AVALUE TABLES
/STATISTICS=CHISQ
/CELLS=COUNT ROW ASRESID
/COUNT ROUND CELL.
Crosstabs
Notes
Output Created		12-FEB-2022 08:42:59
Comments
Input	Data	C:\Users\Hafiz Bashir\Desktop\Kamal\HCQ - KSSH COVID-19 Research2.sav
	Active Dataset	DataSet1
	Filter	<none>
	Weight	<none>
	Split File	<none>
	N of Rows in Working Data File	998
Missing Value Handling	Definition of Missing	User-defined missing values are treated as missing.
	Cases Used	Statistics for each table are based on all the cases with valid data in the specified range(s) for all variables in each table.
Syntax		CROSSTABS /TABLES=Age BY IsthereanybruisesorbleedingITPsymptomsafteryoureceiveanydose /FORMAT=AVALUE TABLES /STATISTICS=CHISQ /CELLS=COUNT ROW ASRESID /COUNT ROUND CELL.
Resources	Processor Time	00:00:00.03
	Elapsed Time	00:00:00.03
	Dimensions Requested	2
	Cells Available	349496
Case Processing Summary
	Cases
	Valid		Missing		Total
	N	Percent	N	Percent	N	Percent
Age * Is there any bruises or bleeding ITP symptoms after you receive any dose?	998	1	0	0	998	1
Age * Is there any bruises or bleeding ITP symptoms after you receive any dose? Crosstabulation
			Is there any bruises or bleeding ITP symptoms after you receive any dose?		Total
			No	Yes
Age	12-18	Count	63	23	86
		% within Age	0.732558	0.267442	1
		Adjusted Residual	-0.130656	0.130656
		p value	0.896048	0.896048
	19-29	Count	379	151	530
		% within Age	0.715094	0.284906	1		Bonferroni corrected level of significance = 0.005
		Adjusted Residual	-1.78875	1.78875
		p value	0.0736549	0.0736549
	30-40	Count	152	59	211
		% within Age	0.720379	0.279621	1
		Adjusted Residual	-0.67363	0.67363
		p value	0.500546	0.500546
	40-60	Count	120	27	147
		% within Age	0.816327	0.183673	1
		Adjusted Residual	2.3259	-2.3259
		p value	0.0200236	0.0200236
	More than 60	Count	23	1	24
		% within Age	0.958333	0.0416667	1
		Adjusted Residual	2.48089	-2.48089
		p value	0.0131056	0.0131056
Total		Count	737	261	998
		% within Age	0.738477	0.261523	1
	There is no significant difference in the frequency of bruises and bleeding ITP symptoms in the different age groups after receiving the vaccine.
Chi-Square Tests
	Value	df	Asymptotic Significance (2-sided)
Pearson Chi-Square	12.494a	4	0.0140341
Likelihood Ratio	15.1278	4	0.0044434
N of Valid Cases	998
a. 0 cells (0.0%) have expected count less than 5. The minimum expected count is 6.28.
CROSSTABS
/TABLES=Placeofresidence BY IsthereanybruisesorbleedingITPsymptomsafteryoureceiveanydose
/FORMAT=AVALUE TABLES
/STATISTICS=CHISQ
/CELLS=COUNT ROW ASRESID
/COUNT ROUND CELL.
Crosstabs
Notes
Output Created		12-FEB-2022 08:43:59
Comments
Input	Data	C:\Users\Hafiz Bashir\Desktop\Kamal\HCQ - KSSH COVID-19 Research2.sav
	Active Dataset	DataSet1
	Filter	<none>
	Weight	<none>
	Split File	<none>
	N of Rows in Working Data File	998
Missing Value Handling	Definition of Missing	User-defined missing values are treated as missing.
	Cases Used	Statistics for each table are based on all the cases with valid data in the specified range(s) for all variables in each table.
Syntax		CROSSTABS /TABLES=Placeofresidence BY IsthereanybruisesorbleedingITPsymptomsafteryoureceiveanydose /FORMAT=AVALUE TABLES /STATISTICS=CHISQ /CELLS=COUNT ROW ASRESID /COUNT ROUND CELL.
Resources	Processor Time	00:00:00.02
	Elapsed Time	00:00:00.02
	Dimensions Requested	2
	Cells Available	349496
Case Processing Summary
	Cases
	Valid		Missing		Total
	N	Percent	N	Percent	N	Percent
Place of residence * Is there any bruises or bleeding ITP symptoms after you receive any dose?	998	1	0	0	998	1
Place of residence * Is there any bruises or bleeding ITP symptoms after you receive any dose? Crosstabulation
			Is there any bruises or bleeding ITP symptoms after you receive any dose?		Total
			No	Yes
Place of residence	Central Region	Count	209	93	302
		% within Place of residence	0.692053	0.307947	1
		Adjusted Residual	-2.19828	2.19828
	Eastern Region	Count	123	32	155
		% within Place of residence	0.793548	0.206452	1
		Adjusted Residual	1.69754	-1.69754
	Southern area	Count	35	9	44
		% within Place of residence	0.795455	0.204545	1
		Adjusted Residual	0.879626	-0.879626
	The northern area	Count	258	85	343
		% within Place of residence	0.752187	0.247813	1
		Adjusted Residual	0.713172	-0.713172
	Western Region	Count	112	42	154
		% within Place of residence	0.727273	0.272727	1
		Adjusted Residual	-0.344043	0.344043
Total		Count	737	261	998
		% within Place of residence	0.738477	0.261523	1
	There is no significant difference in the frequency of bruises and bleeding ITP symptoms in the different regions.
Chi-Square Tests
	Value	df	Asymptotic Significance (2-sided)
Pearson Chi-Square	6.978a	4	0.137069
Likelihood Ratio	7.03039	4	0.134291
N of Valid Cases	998
a. 0 cells (0.0%) have expected count less than 5. The minimum expected count is 11.51.
CROSSTABS
/TABLES=Sex BY IfBruisesorbleedingITPsymptomsappearafteranydayyoureceivethedose
/FORMAT=AVALUE TABLES
/STATISTICS=CHISQ
/CELLS=COUNT ROW ASRESID
/COUNT ROUND CELL.
Crosstabs
Notes
Output Created		12-FEB-2022 08:50:18
Comments
Input	Data	C:\Users\Hafiz Bashir\Desktop\Kamal\HCQ - KSSH COVID-19 Research2.sav
	Active Dataset	DataSet1
	Filter	<none>
	Weight	<none>
	Split File	<none>
	N of Rows in Working Data File	998
Missing Value Handling	Definition of Missing	User-defined missing values are treated as missing.
	Cases Used	Statistics for each table are based on all the cases with valid data in the specified range(s) for all variables in each table.
Syntax		CROSSTABS /TABLES=Sex BY IfBruisesorbleedingITPsymptomsappearafteranydayyoureceivethedose /FORMAT=AVALUE TABLES /STATISTICS=CHISQ /CELLS=COUNT ROW ASRESID /COUNT ROUND CELL.
Resources	Processor Time	00:00:00.02
	Elapsed Time	00:00:00.02
	Dimensions Requested	2
	Cells Available	349496
Case Processing Summary
	Cases
	Valid		Missing		Total
	N	Percent	N	Percent	N	Percent
Sex * If Bruises or bleeding ITP symptoms appear after any day you receive the dose?	998	1	0	0	998	1
Sex * If Bruises or bleeding ITP symptoms appear after any day you receive the dose? Crosstabulation
			If Bruises or bleeding ITP symptoms appear after any day you receive the dose?					Total
			After 1-3 days	After 4-7 days	After 8-14 days	After more than a month	it did not appear
Sex	female	Count	104	46	33	29	573	785
		% within Sex	0.132484	0.0585987	0.0420382	0.0369427	0.729936	1
		Adjusted Residual	0.766772	0.387961	-0.313003	1.31482	-1.17863
	Male	Count	24	11	10	4	164	213
		% within Sex	0.112676	0.0516432	0.0469484	0.0187793	0.769953	1
		Adjusted Residual	-0.766772	-0.387961	0.313003	-1.31482	1.17863
Total		Count	128	57	43	33	737	998
		% within Sex	0.128257	0.0571142	0.0430862	0.0330661	0.738477	1
Chi-Square Tests
	Value	df	Asymptotic Significance (2-sided)
Pearson Chi-Square	2.783a	4	0.594758
Likelihood Ratio	3.02931	4	0.552932
N of Valid Cases	998
a. 0 cells (0.0%) have expected count less than 5. The minimum expected count is 7.04.
	There is no significant difference between males and females in the days after which and bleeding ITP symptoms.
CROSSTABS
/TABLES=Age BY IfBruisesorbleedingITPsymptomsappearafteranydayyoureceivethedose
/FORMAT=AVALUE TABLES
/STATISTICS=CHISQ
/CELLS=COUNT ROW ASRESID
/COUNT ROUND CELL.
Crosstabs
Notes
Output Created		12-FEB-2022 08:50:37
Comments
Input	Data	C:\Users\Hafiz Bashir\Desktop\Kamal\HCQ - KSSH COVID-19 Research2.sav
	Active Dataset	DataSet1
	Filter	<none>
	Weight	<none>
	Split File	<none>
	N of Rows in Working Data File	998
Missing Value Handling	Definition of Missing	User-defined missing values are treated as missing.
	Cases Used	Statistics for each table are based on all the cases with valid data in the specified range(s) for all variables in each table.
Syntax		CROSSTABS /TABLES=Age BY IfBruisesorbleedingITPsymptomsappearafteranydayyoureceivethedose /FORMAT=AVALUE TABLES /STATISTICS=CHISQ /CELLS=COUNT ROW ASRESID /COUNT ROUND CELL.
Resources	Processor Time	00:00:00.02
	Elapsed Time	00:00:00.03
	Dimensions Requested	2
	Cells Available	349496
Case Processing Summary
	Cases
	Valid		Missing		Total
	N	Percent	N	Percent	N	Percent
Age * If Bruises or bleeding ITP symptoms appear after any day you receive the dose?	998	1	0	0	998	1
Age * If Bruises or bleeding ITP symptoms appear after any day you receive the dose? Crosstabulation
			If Bruises or bleeding ITP symptoms appear after any day you receive the dose?					Total
			After 1-3 days	After 4-7 days	After 8-14 days	After more than a month	it did not appear
Age	12-18	Count	12	6	3	2	63	86
		% within Age	0.139535	0.0697674	0.0348837	0.0232558	0.732558	1
		Adjusted Residual	0.327212	0.528952	-0.391882	-0.532243	-0.130656
	19-29	Count	73	36	23	19	379	530
		% within Age	0.137736	0.0679245	0.0433962	0.0358491	0.715094	1
		Adjusted Residual	0.953069	1.56609	0.0513349	0.523229	-1.78875
	30-40	Count	31	9	10	9	152	211
		% within Age	0.146919	0.042654	0.0473934	0.042654	0.720379	1
		Adjusted Residual	0.912987	-1.01928	0.346983	0.877107	-0.67363
	40-60	Count	12	5	7	3	120	147
		% within Age	0.0816327	0.0340136	0.047619	0.0204082	0.816327	1
		Adjusted Residual	-1.83077	-1.30702	0.293108	-0.929465	2.3259
	More than 60	Count	0	1	0	0	23	24
		% within Age	0	0.0416667	0	0	0.958333	1
		Adjusted Residual	-1.90212	-0.330103	-1.05226	-0.917032	2.48089
Total		Count	128	57	43	33	737	998
		% within Age	0.128257	0.0571142	0.0430862	0.0330661	0.738477	1
Chi-Square Tests
	Value	df	Asymptotic Significance (2-sided)
Pearson Chi-Square	17.236a	16	0.370499
Likelihood Ratio	22.6418	16	0.12365
N of Valid Cases	998
a. 8 cells (32.0%) have expected count less than 5. The minimum expected count is .79.
	There is no significant difference between the different age groups in the days after which and bleeding ITP symptoms.
CROSSTABS
/TABLES=Placeofresidence BY IfBruisesorbleedingITPsymptomsappearafteranydayyoureceivethedose
/FORMAT=AVALUE TABLES
/STATISTICS=CHISQ
/CELLS=COUNT ROW ASRESID
/COUNT ROUND CELL.
Crosstabs
Notes
Output Created		12-FEB-2022 08:51:04
Comments
Input	Data	C:\Users\Hafiz Bashir\Desktop\Kamal\HCQ - KSSH COVID-19 Research2.sav
	Active Dataset	DataSet1
	Filter	<none>
	Weight	<none>
	Split File	<none>
	N of Rows in Working Data File	998
Missing Value Handling	Definition of Missing	User-defined missing values are treated as missing.
	Cases Used	Statistics for each table are based on all the cases with valid data in the specified range(s) for all variables in each table.
Syntax		CROSSTABS /TABLES=Placeofresidence BY IfBruisesorbleedingITPsymptomsappearafteranydayyoureceivethedose /FORMAT=AVALUE TABLES /STATISTICS=CHISQ /CELLS=COUNT ROW ASRESID /COUNT ROUND CELL.
Resources	Processor Time	00:00:00.02
	Elapsed Time	00:00:00.04
	Dimensions Requested	2
	Cells Available	349496
Case Processing Summary
	Cases
	Valid		Missing		Total
	N	Percent	N	Percent	N	Percent
Place of residence * If Bruises or bleeding ITP symptoms appear after any day you receive the dose?	998	1	0	0	998	1
Place of residence * If Bruises or bleeding ITP symptoms appear after any day you receive the dose? Crosstabulation
			If Bruises or bleeding ITP symptoms appear after any day you receive the dose?					Total
			After 1-3 days	After 4-7 days	After 8-14 days	After more than a month	it did not appear
Place of residence	Central Region	Count	52	13	15	13	209	302
		% within Place of residence	0.172185	0.0430464	0.0496689	0.0430464	0.692053	1
		Adjusted Residual	2.73389	-1.26151	0.674626	1.16149	-2.19828
	Eastern Region	Count	14	9	5	4	123	155
		% within Place of residence	0.0903226	0.0580645	0.0322581	0.0258065	0.793548	1
		Adjusted Residual	-1.53678	0.0554716	-0.722378	-0.549977	1.69754
	Southern area	Count	2	1	3	3	35	44
		% within Place of residence	0.0454545	0.0227273	0.0681818	0.0681818	0.795455	1
		Adjusted Residual	-1.68006	-1.00533	0.838514	1.33238	0.879626
	The northern area	Count	37	25	12	11	258	343
		% within Place of residence	0.107872	0.0728863	0.0349854	0.03207	0.752187	1
		Adjusted Residual	-1.39368	1.55374	-0.912035	-0.127359	0.713172
	Western Region	Count	23	9	8	2	112	154
		% within Place of residence	0.149351	0.0584416	0.0519481	0.012987	0.727273	1
		Adjusted Residual	0.851299	0.0771848	0.588945	-1.51534	-0.344043
Total		Count	128	57	43	33	737	998
		% within Place of residence	0.128257	0.0571142	0.0430862	0.0330661	0.738477	1
Chi-Square Tests
	Value	df	Asymptotic Significance (2-sided)
Pearson Chi-Square	22.421a	16	0.130101
Likelihood Ratio	23.3163	16	0.105538
N of Valid Cases	998
a. 3 cells (12.0%) have expected count less than 5. The minimum expected count is 1.45.
	There is no significant difference between the residents of the different regions in the days after which and bleeding ITP symptoms.
CROSSTABS
/TABLES=Sex BY Afteranydoseappearedonyouthesesymptoms
/FORMAT=AVALUE TABLES
/STATISTICS=CHISQ
/CELLS=COUNT ROW ASRESID
/COUNT ROUND CELL.
Crosstabs
Notes
Output Created		12-FEB-2022 08:51:27
Comments
Input	Data	C:\Users\Hafiz Bashir\Desktop\Kamal\HCQ - KSSH COVID-19 Research2.sav
	Active Dataset	DataSet1
	Filter	<none>
	Weight	<none>
	Split File	<none>
	N of Rows in Working Data File	998
Missing Value Handling	Definition of Missing	User-defined missing values are treated as missing.
	Cases Used	Statistics for each table are based on all the cases with valid data in the specified range(s) for all variables in each table.
Syntax		CROSSTABS /TABLES=Sex BY Afteranydoseappearedonyouthesesymptoms /FORMAT=AVALUE TABLES /STATISTICS=CHISQ /CELLS=COUNT ROW ASRESID /COUNT ROUND CELL.
Resources	Processor Time	00:00:00.02
	Elapsed Time	00:00:00.02
	Dimensions Requested	2
	Cells Available	349496
Case Processing Summary
	Cases
	Valid		Missing		Total
	N	Percent	N	Percent	N	Percent
Sex * After any dose appeared on you these symptoms?	998	1	0	0	998	1
Sex * After any dose appeared on you these symptoms? Crosstabulation
			After any dose appeared on you these symptoms?				Total
			After the first dose	After the second dose	In both doses	it did not appear
Sex	female	Count	68	80	64	573	785
		% within Sex	0.0866242	0.101911	0.0815287	0.729936	1
		Adjusted Residual	-0.118277	0.965621	0.994213	-1.17863
	Male	Count	19	17	13	164	213
		% within Sex	0.0892019	0.0798122	0.0610329	0.769953	1
		Adjusted Residual	0.118277	-0.965621	-0.994213	1.17863
Total		Count	87	97	77	737	998
		% within Sex	0.0871743	0.0971944	0.0771543	0.738477	1
Chi-Square Tests
	Value	df	Asymptotic Significance (2-sided)
Pearson Chi-Square	2.130a	3	0.545855
Likelihood Ratio	2.21929	3	0.528159
N of Valid Cases	998
a. 0 cells (0.0%) have expected count less than 5. The minimum expected count is 16.43.
	There is no significant difference between males and females in the occurance of the symptoms after the first, the second, or both doses..
CROSSTABS
/TABLES=Age BY Afteranydoseappearedonyouthesesymptoms
/FORMAT=AVALUE TABLES
/STATISTICS=CHISQ
/CELLS=COUNT ROW ASRESID
/COUNT ROUND CELL.
Crosstabs
Notes
Output Created		12-FEB-2022 08:51:41
Comments
Input	Data	C:\Users\Hafiz Bashir\Desktop\Kamal\HCQ - KSSH COVID-19 Research2.sav
	Active Dataset	DataSet1
	Filter	<none>
	Weight	<none>
	Split File	<none>
	N of Rows in Working Data File	998
Missing Value Handling	Definition of Missing	User-defined missing values are treated as missing.
	Cases Used	Statistics for each table are based on all the cases with valid data in the specified range(s) for all variables in each table.
Syntax		CROSSTABS /TABLES=Age BY Afteranydoseappearedonyouthesesymptoms /FORMAT=AVALUE TABLES /STATISTICS=CHISQ /CELLS=COUNT ROW ASRESID /COUNT ROUND CELL.
Resources	Processor Time	00:00:00.03
	Elapsed Time	00:00:00.03
	Dimensions Requested	2
	Cells Available	349496
Case Processing Summary
	Cases
	Valid		Missing		Total
	N	Percent	N	Percent	N	Percent
Age * After any dose appeared on you these symptoms?	998	1	0	0	998	1
Age * After any dose appeared on you these symptoms? Crosstabulation
			After any dose appeared on you these symptoms?				Total
			After the first dose	After the second dose	In both doses	it did not appear
Age	12-18	Count	5	9	9	63	86
		% within Age	0.0581395	0.104651	0.104651	0.732558	1
		Adjusted Residual	-0.998499	0.244203	0.999667	-0.130656
	19-29	Count	54	53	44	379	530
		% within Age	0.101887	0.1	0.0830189	0.715094	1
		Adjusted Residual	1.75338	0.318412	0.738875	-1.78875
	30-40	Count	18	24	17	152	211
		% within Age	0.0853081	0.113744	0.0805687	0.720379	1
		Adjusted Residual	-0.108221	0.913884	0.20931	-0.67363
	40-60	Count	9	11	7	120	147
		% within Age	0.0612245	0.0748299	0.047619	0.816327	1
		Adjusted Residual	-1.20783	-0.991288	-1.4533	2.3259
	More than 60	Count	1	0	0	23	24
		% within Age	0.0416667	0	0	0.958333	1
		Adjusted Residual	-0.799996	-1.6271	-1.43386	2.48089
Total		Count	87	97	77	737	998
		% within Age	0.0871743	0.0971944	0.0771543	0.738477	1
Chi-Square Tests
	Value	df	Asymptotic Significance (2-sided)
Pearson Chi-Square	15.530a	12	0.213741
Likelihood Ratio	20.0637	12	0.065891
N of Valid Cases	998
a. 3 cells (15.0%) have expected count less than 5. The minimum expected count is 1.85.
	There is no significant difference between the different age groups in the occurance of the symptoms after the first, the second, or both doses..
CROSSTABS
/TABLES=Placeofresidence BY Afteranydoseappearedonyouthesesymptoms
/FORMAT=AVALUE TABLES
/STATISTICS=CHISQ
/CELLS=COUNT ROW ASRESID
/COUNT ROUND CELL.
Crosstabs
Notes
Output Created		12-FEB-2022 08:51:58
Comments
Input	Data	C:\Users\Hafiz Bashir\Desktop\Kamal\HCQ - KSSH COVID-19 Research2.sav
	Active Dataset	DataSet1
	Filter	<none>
	Weight	<none>
	Split File	<none>
	N of Rows in Working Data File	998
Missing Value Handling	Definition of Missing	User-defined missing values are treated as missing.
	Cases Used	Statistics for each table are based on all the cases with valid data in the specified range(s) for all variables in each table.
Syntax		CROSSTABS /TABLES=Placeofresidence BY Afteranydoseappearedonyouthesesymptoms /FORMAT=AVALUE TABLES /STATISTICS=CHISQ /CELLS=COUNT ROW ASRESID /COUNT ROUND CELL.
Resources	Processor Time	00:00:00.02
	Elapsed Time	00:00:00.03
	Dimensions Requested	2
	Cells Available	349496
Case Processing Summary
	Cases
	Valid		Missing		Total
	N	Percent	N	Percent	N	Percent
Place of residence * After any dose appeared on you these symptoms?	998	1	0	0	998	1
Place of residence * After any dose appeared on you these symptoms? Crosstabulation
			After any dose appeared on you these symptoms?				Total
			After the first dose	After the second dose	In both doses	it did not appear
Place of residence	Central Region	Count	35	33	25	209	302
		% within Place of residence	0.115894	0.109272	0.0827815	0.692053	1
		Adjusted Residual	2.11863	0.848419	0.438842	-2.19828
	Eastern Region	Count	11	11	10	123	155
		% within Place of residence	0.0709677	0.0709677	0.0645161	0.793548	1
		Adjusted Residual	-0.778254	-1.19934	-0.641589	1.69754
	Southern area	Count	5	3	1	35	44
		% within Place of residence	0.113636	0.0681818	0.0227273	0.795455	1
		Adjusted Residual	0.636432	-0.664486	-1.38385	0.879626
	The northern area	Count	24	37	24	258	343
		% within Place of residence	0.0699708	0.107872	0.0699708	0.752187	1
		Adjusted Residual	-1.39418	0.824018	-0.615433	0.713172
	Western Region	Count	12	13	17	112	154
		% within Place of residence	0.0779221	0.0844156	0.11039	0.727273	1
		Adjusted Residual	-0.442603	-0.582139	1.68077	-0.344043
Total		Count	87	97	77	737	998
		% within Place of residence	0.0871743	0.0971944	0.0771543	0.738477	1
Chi-Square Tests
	Value	df	Asymptotic Significance (2-sided)
Pearson Chi-Square	13.979a	12	0.302049
Likelihood Ratio	14.356	12	0.278552
N of Valid Cases	998
a. 3 cells (15.0%) have expected count less than 5. The minimum expected count is 3.39.
	There is no significant difference between the residents of the different regions in the occurance of the symptoms after the first, the second, or both doses..
	Selected 722 symtoms data below:
	FREQUENCIES VARIABLES=Whataresymptomsthatappearedaftertakingthevaccine Whatkindofvaccineyoureceived
	/ORDER=ANALYSIS.
	Frequencies
	Notes
	Output Created		14-MAR-2022 14:32:09
	Comments
	Input	Active Dataset	DataSet3
		Filter	<none>
		Weight	<none>
		Split File	<none>
		N of Rows in Working Data File	722
	Missing Value Handling	Definition of Missing	User-defined missing values are treated as missing.
		Cases Used	Statistics are based on all cases with valid data.
	Syntax		FREQUENCIES VARIABLES=Whataresymptomsthatappearedaftertakingthevaccine Whatkindofvaccineyoureceived /ORDER=ANALYSIS.
	Resources	Processor Time	00:00:00.02
		Elapsed Time	00:00:00.02
	Statistics
			What are symptoms that appeared after taking the vaccine	What kind of vaccine you received?
	N	Valid	722	722
		Missing	0	0
	Frequency Table
	What are symptoms that appeared after taking the vaccine
			Frequency	Percent	Valid Percent	Cumulative Percent
	Valid	skin irritation	62	8.58726	8.58726	8.58726					Percent
		ageusia	10	1.38504	1.38504	9.9723			Valid	skin irritation	8.58726
		anosmia	24	3.3241	3.3241	13.2964				ageusia	1.38504
		anosmia and ageusia	58	8.03324	8.03324	21.3296				anosmia	3.3241
		Bruises or bleeding ITP	130	18.0055	18.0055	39.3352				anosmia and ageusia	8.03324
		fatigue and weakness	21	2.90859	2.90859	42.2438				Bruises or bleeding ITP	18.0055
		GIT symptoms	127	17.59	17.59	59.8338				fatigue and weakness	2.90859
		inattention	130	18.0055	18.0055	77.8393				GIT symptoms	17.59
		lymph node swelling	3	0.415512	0.415512	78.2548				inattention	18.0055
		Menstrual disorder	14	1.93906	1.93906	80.1939				lymph node swelling	0.415512
		Shortness of breath	143	19.8061	19.8061	100				Menstrual disorder	1.93906
		Total	722	100	100					Shortness of breath	19.8061
	What kind of vaccine you received?
			Frequency	Percent	Valid Percent	Cumulative Percent
	Valid	AstraZeneca	135	18.6981	18.6981	18.6981					Percent
		Moderna	35	4.84765	4.84765	23.5457			Valid	AstraZeneca	18.6981
		Pfizer-BioNTech	552	76.4543	76.4543	100				Moderna	4.84765
		Total	722	100	100					Pfizer-BioNTech	76.4543
